# Supplementary material for: Democratization of terrorism: an analysis of vehicle-based terrorist events
Source: HighWire-hosted journal article supplement (doi:10.1136/tsaco-2022-000964), 2022-09-01
Supplement: tsaco-2022-000964supp001_data_supplement.pdf [file tsaco-2022-000964supp001_data_supplement.pdf]

| DATE     | COUNTRY                  | CITY                           | PERPETRATOR GROUP                                          | FATALITIES | INJURED | TARGET TYPE                                                                         | REGION                     | ATTACK TYPE                                    |
|----------|--------------------------|--------------------------------|------------------------------------------------------------|------------|---------|-------------------------------------------------------------------------------------|----------------------------|------------------------------------------------|
| 12/31/19 | Russia                   | Magas                          | Caucasus Province of the Islamic State                     | 2          | 4       | Police                                                                              | Eastern Europe             | Armed Assault                                  |
| 10/28/19 | Canada                   | Six Nations of the Grand River | Unknown                                                    | 0          | 0       | Journalists & Media                                                                 | North America              | Facility/Infrastructure Attack                 |
| 9/3/19   | United Kingdom           | Londonderry                    | Unknown                                                    | 0          | 0       | Private Citizens & Property                                                         | Western Europe             | Facility/Infrastructure Attack                 |
| 8/16/19  | West Bank and Gaza Strip | Elazar                         | Palestinian Extremists                                     | 1          | 2       | Private Citizens & Property                                                         | Middle East & North Africa | Unarmed Assault                                |
| 7/6/19   | West Bank and Gaza Strip | Hizma                          | Palestinian Extremists                                     | 0          | 5       | Military                                                                            | Middle East & North Africa | Unarmed Assault                                |
| 6/25/19  | South Korea              | Soul                           | Unknown                                                    | 0          | 0       | Government (Diplomatic)                                                             | East Asia                  | Armed Assault                                  |
| 5/14/19  | India                    | Rae Bareilly district          | Bharatiya Janata Party (suspected)                         | 0          | 1       | Government (General)                                                                | South Asia                 | Unarmed Assault                                |
| 5/11/19  | Canada                   | Edson                          | Neo-Nazi extremists                                        | 0          | 0       | Government (General)                                                                | North America              | Facility/Infrastructure Attack                 |
| 4/23/19  | United States            | Sunnyvale                      | Anti-Muslim extremists                                     | 0          | 8       | Private Citizens & Property                                                         | North America              | Unarmed Assault                                |
| 4/16/19  | United States            | Metairie                       | White supremacists/nationalists                            | 0          | 1       | Private Citizens & Property                                                         | North America              | Unarmed Assault                                |
| 3/27/19  | United States            | National Harbor                | Jihadi-inspired extremists                                 | 0          | 0       | Private Citizens & Property                                                         | North America              | Unarmed Assault                                |
| 3/27/19  | United States            | Dulles                         | Jihadi-inspired extremists                                 | 0          | 0       | Airports and Aircraft                                                               | North America              | Unarmed Assault                                |
| 3/26/19  | West Bank and Gaza Strip | Jerusalem                      | Unknown                                                    | 0          | 2       | Private Citizens & Property                                                         | Middle East & North Africa | Unarmed Assault                                |
| 3/20/19  | Italy                    | Crema                          | Pro-migration extremists                                   | 0          | 12      | Educational Institution                                                             | Western Europe             | Hijacking                                      |
| 3/17/19  | Iraq                     | Sinjar                         | Kurdistan Workers' Party (PKK)                             | 2          | 7       | Military                                                                            | Middle East & North Africa | Unarmed Assault                                |
| 3/13/19  | United States            | New York City                  | Conspiracy theory extremists                               | 1          | 0       | Private Citizens & Property                                                         | North America              | Assassination                                  |
| 3/4/19   | West Bank and Gaza Strip | Nimah                          | Palestinian Extremists                                     | 2          | 3       | Police,Military                                                                     | Middle East & North Africa | Unarmed Assault                                |
| 1/1/19   | Germany                  | Essen                          | Anti-immigrant extremists                                  | 0          | 0       | Private Citizens & Property,Private Citizens & Property                             | Western Europe             | Unarmed Assault                                |
| 1/1/19   | Germany                  | Boitrop                        | Anti-immigrant extremists                                  | 0          | 4       | Private Citizens & Property,Private Citizens & Property                             | Western Europe             | Unarmed Assault                                |
| 1/1/19   | Germany                  | Boitrop                        | Anti-immigrant extremists                                  | 0          | 0       | Private Citizens & Property                                                         | Western Europe             | Unarmed Assault                                |
| 1/1/19   | Japan                    | Tokyo                          | Unknown                                                    | 0          | 8       | Private Citizens & Property                                                         | East Asia                  | Armed Assault                                  |
| 12/30/18 | India                    | Lakhmir Pura                   | Unknown                                                    | 1          | 0       | Government (General)                                                                | South Asia                 | Unarmed Assault,Facility/Infrastructure Attack |
| 12/26/18 | West Bank and Gaza Strip | Har Bracha                     | Palestinian Extremists                                     | 0          | 1       | Military,Transportation                                                             | Middle East & North Africa | Unarmed Assault                                |
| 12/11/18 | West Bank and Gaza Strip | Unknown                        | Palestinian Extremists                                     | 0          | 1       | Military                                                                            | Middle East & North Africa | Unarmed Assault                                |
| 12/11/18 | West Bank and Gaza Strip | Idhna                          | Palestinian Extremists                                     | 1          | 1       | Government (General)                                                                | Middle East & North Africa | Unarmed Assault                                |
| 11/26/18 | West Bank and Gaza Strip | Al-Aroub                       | Palestinian Extremists                                     | 1          | 4       | Military                                                                            | Middle East & North Africa | Unarmed Assault                                |
| 11/23/18 | United States            | Los Angeles                    | Anti-Semitic extremists                                    | 0          | 0       | Religious Figures/Institutions                                                      | North America              | Unarmed Assault                                |
| 9/8/18   | Cameroun                 | Bamenda                        | Separatists                                                | 1          | 0       | Private Citizens & Property,Transportation,Transportation                           | Sub-Saharan Africa         | Armed Assault,Facility/Infrastructure Attack   |
| 8/27/18  | West Bank and Gaza Strip | Nablus                         | Palestinian Extremists                                     | 0          | 2       | Military,Private Citizens & Property                                                | Middle East & North Africa | Unarmed Assault                                |
| 8/22/18  | Netherlands              | Bemmel                         | Unknown                                                    | 1          | 0       | Government (General)                                                                | Western Europe             | Armed Assault                                  |
| 8/20/18  | Russia                   | Grozny                         | Caucasus Province of the Islamic State                     | 2          | 2       | Police                                                                              | Eastern Europe             | Armed Assault                                  |
| 8/14/18  | United Kingdom           | London                         | Unknown                                                    | 0          | 3       | Private Citizens & Property                                                         | Western Europe             | Unarmed Assault                                |
| 7/29/18  | Tajikistan               | Danghura district              | Islamic Renaissance Party of Tajikistan (IRPT) (suspected) | 4          | 3       | Private Citizens & Property,Private Citizens & Property,Private Citizens & Property | Central Asia               | Armed Assault                                  |
| 7/6/18   | United States            | Nesconset                      | Anti-Trump extremists                                      | 0          | 0       | Government (General)                                                                | North America              | Unarmed Assault                                |
| 7/4/18   | United States            | Boynton Beach                  | Unknown                                                    | 0          | 1       | Private Citizens & Property                                                         | North America              | Unarmed Assault                                |
| 6/26/18  | Netherlands              | Amsterdam                      | Unknown                                                    | 0          | 0       | Journalists & Media                                                                 | Western Europe             | Facility/Infrastructure Attack                 |
| 6/15/18  | United States            | Boulder City                   | Conspiracy theory extremists                               | 0          | 0       | Private Citizens & Property                                                         | North America              | Armed Assault                                  |
| 6/2/18   | West Bank and Gaza Strip | Hebron                         | Palestinian Extremists                                     | 1          | 0       | Military                                                                            | Middle East & North Africa | Unarmed Assault                                |
| 5/16/18  | Indonesia                | Pkanbaru                       | Negara Islam Indonesia (NII)                               | 5          | 3       | Police                                                                              | Southeast Asia             | Armed Assault                                  |
| 5/11/18  | West Bank and Gaza Strip | Unknown                        | Palestinian Extremists                                     | 0          | 0       | Military                                                                            | Middle East & North Africa | Unarmed Assault                                |
| 5/11/18  | West Bank and Gaza Strip | Shavei Shimon                  | Unknown                                                    | 0          | 1       | Military                                                                            | Middle East & North Africa | Unarmed Assault                                |
| 4/23/18  | Canada                   | Toronto                        | Incel extremists                                           | 10         | 15      | Private Citizens & Property,Private Citizens & Property,Private Citizens & Property | North America              | Unarmed Assault                                |
| 4/5/18   | United States            | Houston                        | Anti-Muslim extremists                                     | 0          | 1       | Private Citizens & Property                                                         | North America              | Armed Assault                                  |
| 3/29/18  | France                   | Varces-Allieres-et-Risset      | Unknown                                                    | 0          | 0       | Military                                                                            | Western Europe             | Unarmed Assault                                |
| 3/16/18  | West Bank and Gaza Strip | Mevo Dafan                     | Palestinian Extremists                                     | 2          | 3       | Military                                                                            | Middle East & North Africa | Unarmed Assault                                |
| 3/4/18   | Israel                   | Acre                           | Anti-Israeli extremists                                    | 0          | 4       | Police,Military,Private Citizens & Property                                         | Middle East & North Africa | Unarmed Assault                                |
| 1/27/18  | Israel                   | Tel Aviv                       | Unknown                                                    | 0          | 1       | Military                                                                            | Middle East & North Africa | Unarmed Assault                                |
| 1/19/18  | West Bank and Gaza Strip | Qar el Yahud                   | Palestinian Extremists                                     | 0          | 1       | Military                                                                            | Middle East & North Africa | Unarmed Assault                                |
| 12/24/17 | Germany                  | Berlin                         | Unknown                                                    | 0          | 1       | Private Citizens & Property                                                         | Western Europe             | Armed Assault                                  |
| 12/21/17 | Australia                | Melbourne                      | Muslim extremists                                          | 1          | 18      | Private Citizens & Property,Private Citizens & Property                             | Australasia & Oceania      | Unarmed Assault                                |
| 11/17/17 | West Bank and Gaza Strip | Alon Shvut                     | Palestinian Extremists                                     | 0          | 3       | Military,Private Citizens & Property                                                | Middle East & North Africa | Armed Assault                                  |
| 10/31/17 | United States            | New York City                  | Jihadi-inspired extremists                                 | 8          | 13      | Educational Institution,Private Citizens & Property,Tourists                        | North America              | Unarmed Assault                                |
| 10/19/17 | Russia                   | Yandare                        | Unknown                                                    | 1          | 3       | Police                                                                              | Eastern Europe             | Armed Assault                                  |
| 9/30/17  | Canada                   | Edmonton                       | Jihadi-inspired extremists                                 | 0          | 4       | Private Citizens & Property                                                         | North America              | Unarmed Assault                                |
| 9/30/17  | Canada                   | Edmonton                       | Jihadi-inspired extremists                                 | 0          | 1       | Police                                                                              | North America              | Armed Assault                                  |
| 9/20/17  | United Kingdom           | Leicester                      | Anti-Muslim extremists                                     | 0          | 1       | Private Citizens & Property                                                         | Western Europe             | Unarmed Assault                                |
| 9/6/17   | United States            | Mandan                         | Anti-Trump extremists                                      | 0          | 0       | Government (General)                                                                | North America              | Assassination                                  |
| 8/18/17  | Spain                    | Cambrils                       | Muslim extremists                                          | 6          | 6       | Private Citizens & Property                                                         | Western Europe             | Armed Assault                                  |
| 8/17/17  | Spain                    | Barcelona                      | Muslim extremists                                          | 1          | 3       | Police,Private Citizens & Property                                                  | Western Europe             | Hijacking                                      |
| 8/17/17  | Spain                    | Barcelona                      | Muslim extremists                                          | 14         | 101     | Private Citizens & Property                                                         | Western Europe             | Unarmed Assault                                |
| 8/15/17  | Iraq                     | Sulaymaniyah                   | Unknown                                                    | 1          | Unknown | Government (General)                                                                | Middle East & North Africa | Unarmed Assault                                |
| 8/12/17  | United States            | Charlottesville                | Neo-Nazi extremists                                        | 1          | 28      | Private Citizens & Property                                                         | North America              | Unarmed Assault                                |
| 8/9/17   | France                   | Levallois-Perret               | Muslim extremists                                          | 0          | 6       | Military                                                                            | Western Europe             | Unarmed Assault                                |
| 7/18/17  | West Bank and Gaza Strip | Beit Einun                     | Palestinian Extremists                                     | 1          | 2       | Military                                                                            | Middle East & North Africa | Unarmed Assault                                |
| 7/17/17  | West Bank and Gaza Strip | Hebron                         | Unknown                                                    | 0          | 0       | Military                                                                            | Middle East & North Africa | Unarmed Assault                                |
| 7/10/17  | West Bank and Gaza Strip | Tekoa                          | Palestinian Extremists                                     | 1          | 1       | Military                                                                            | Middle East & North Africa | Armed Assault                                  |
| 6/30/17  | Yemen                    | Hadhran                        | Houthi extremists (Ansar Allah)                            | 1          | 0       | Private Citizens & Property                                                         | Middle East & North Africa | Unarmed Assault                                |
| 6/29/17  | France                   | Cerel                          | Anti-Muslim extremists                                     | 0          | 0       | Private Citizens & Property                                                         | Western Europe             | Unarmed Assault                                |
| 6/23/17  | United Kingdom           | London                         | Anti-Muslim extremists                                     | 0          | 0       | Private Citizens & Property                                                         | Western Europe             | Unarmed Assault                                |
| 6/19/17  | United Kingdom           | London                         | Anti-Muslim extremists                                     | 1          | 12      | Private Citizens & Property                                                         | Western Europe             | Unarmed Assault                                |
| 6/11/17  | Sweden                   | Malmo                          | Neo-Nazi extremists                                        | 0          | 0       | Private Citizens & Property                                                         | Western Europe             | Unarmed Assault                                |
| 6/10/17  | Sweden                   | Malmo                          | Neo-Nazi extremists                                        | 0          | 0       | Private Citizens & Property                                                         | Western Europe             | Unarmed Assault                                |
| 6/9/17   | Pakistan                 | Lahore                         | Unknown                                                    | 0          | 1       | Journalists & Media                                                                 | South Asia                 | Assassination                                  |
| 6/3/17   | United Kingdom           | London                         | Jihadi-inspired extremists                                 | 11         | 48      | Private Citizens & Property,Private Citizens & Property                             | Western Europe             | Armed Assault                                  |
| 4/19/17  | West Bank and Gaza Strip | Alon Shvut                     | Palestinian Extremists                                     | 1          | 1       | Private Citizens & Property                                                         | Middle East & North Africa | Unarmed Assault                                |

|          |                          |                         |                                                          |         |     |                                                         |                            |                                                   |
|----------|--------------------------|-------------------------|----------------------------------------------------------|---------|-----|---------------------------------------------------------|----------------------------|---------------------------------------------------|
| 4/11/17  | Indonesia                | Baryum                  | Jamash Ansharut Daulah                                   | 0       | 3   | Police                                                  | Southeast Asia             | Armed Assault                                     |
| 4/7/17   | Sweden                   | Stockholm               | Jihadi-inspired extremists                               | 5       | 14  | Private Citizens & Property                             | Western Europe             | Hijacking                                         |
| 4/6/17   | West Bank and Gaza Strip | Ora                     | Palestinian Extremists                                   | 1       | 2   | Military                                                | Middle East & North Africa | Unarmed Assault                                   |
| 3/22/17  | United Kingdom           | London                  | Muslim extremists                                        | 6       | 50  | Police,Private Citizens & Property                      | Western Europe             | Armed Assault                                     |
| 3/15/17  | West Bank and Gaza Strip | Alon Shvut              | Palestinian Extremists                                   | 0       | 1   | Military,Transportation                                 | Middle East & North Africa | Unarmed Assault                                   |
| 2/2/17   | West Bank and Gaza Strip | Geva Binayamin          | Unknown                                                  | 0       | 4   | Police                                                  | Middle East & North Africa | Unarmed Assault                                   |
| 1/25/17  | West Bank and Gaza Strip | Kochav Yaakov           | Palestinian Extremists                                   | 1       | 0   | Transportation                                          | Middle East & North Africa | Unarmed Assault                                   |
| 1/22/17  | Iraq                     | Hawijah district        | Islamic State of Iraq and the Levant (ISIL)              | 7       | 0   | Private Citizens & Property                             | Middle East & North Africa | Hostage Taking (Kidnapping)                       |
| 1/19/17  | Yemen                    | Badan district          | Houthi extremists (Ansar Allah)                          | 1       | 1   | Private Citizens & Property                             | Middle East & North Africa | Unarmed Assault                                   |
| 1/8/17   | West Bank and Gaza Strip | Jerusalem               | Groups of Martyr Baha Eleyan,Islamic State of Iraq and t | 5       | 17  | Military                                                | Middle East & North Africa | Unarmed Assault                                   |
| 12/28/16 | China                    | Karakax                 | Uighur Separatists                                       | 5       | 3   | Government (General)                                    | East Asia                  | Bombing/Explosion,Armed Assault                   |
| 12/19/16 | Germany                  | Berlin                  | Jihadi-inspired extremists                               | 12      | 48  | Private Citizens & Property,Private Citizens & Property | Western Europe             | Unarmed Assault                                   |
| 12/17/16 | Russia                   | Grozny                  | Caucasus Province of the Islamic State                   | 0       | 1   | Police                                                  | Eastern Europe             | Armed Assault                                     |
| 12/13/16 | West Bank and Gaza Strip | Jerusalem               | Unknown                                                  | 0       | 0   | Police                                                  | Middle East & North Africa | Armed Assault                                     |
| 11/28/16 | United States            | Columbus                | Jihadi-inspired extremists                               | 1       | 11  | Private Citizens & Property                             | North America              | Armed Assault                                     |
| 10/30/16 | West Bank and Gaza Strip | Bayt Umar               | Palestinian Extremists                                   | 1       | 3   | Police                                                  | Middle East & North Africa | Unarmed Assault                                   |
| 10/28/16 | West Bank and Gaza Strip | Ora                     | Palestinian Extremists                                   | 0       | 1   | Military                                                | Middle East & North Africa | Armed Assault                                     |
| 10/19/16 | Iraq                     | Safinah                 | Islamic State of Iraq and the Levant (ISIL)              | unknown | 6   | Private Citizens & Property                             | Middle East & North Africa | Hostage Taking (Kidnapping)                       |
| 9/16/16  | West Bank and Gaza Strip | Kiryat Arba             | Palestinian Extremists                                   | 1       | 4   | Transportation                                          | Middle East & North Africa | Unarmed Assault                                   |
| 9/14/16  | United States            | Phoenix                 | Anti-White extremists (suspected)                        | 0       | 3   | Police                                                  | North America              | Unarmed Assault                                   |
| 8/29/16  | Belgium                  | Brussels                | Unknown                                                  | 0       | 0   | Government (General)                                    | Western Europe             | Facility/Infrastructure Attack                    |
| 8/23/16  | India                    | Sidhbari                | Unknown                                                  | 0       | 1   | Private Citizens & Property                             | South Asia                 | Unarmed Assault                                   |
| 8/10/16  | Saudi Arabia             | Bisha                   | Islamic State of Iraq and the Levant (ISIL)              | 1       | 0   | Police                                                  | Middle East & North Africa | Armed Assault                                     |
| 7/14/16  | Libya                    | Benghazi                | Barqa Province of the Islamic State                      | 13      | 0   | Military                                                | Middle East & North Africa | Armed Assault                                     |
| 7/14/16  | France                   | Nice                    | Jihadi-inspired extremists                               | 87      | 433 | Private Citizens & Property,Private Citizens & Property | Western Europe             | Armed Assault                                     |
| 7/6/16   | West Bank and Gaza Strip | Neve Daniel             | Palestinian Extremists                                   | 0       | 4   | Military                                                | Middle East & North Africa | Unarmed Assault                                   |
| 6/24/16  | West Bank and Gaza Strip | Kiryat Arba             | Palestinian Extremists                                   | 1       | 2   | Private Citizens & Property                             | Middle East & North Africa | Unarmed Assault                                   |
| 5/26/16  | India                    | Ramban                  | Unknown                                                  | 1       | 0   | Police                                                  | South Asia                 | Unarmed Assault                                   |
| 5/3/16   | West Bank and Gaza Strip | Ein Arik                | Palestinian Extremists                                   | 1       | 3   | Military                                                | Middle East & North Africa | Unarmed Assault                                   |
| 3/14/16  | West Bank and Gaza Strip | Kiryat Arba             | Al-Aqsa Martyrs Brigade,Hamas (Islamic Resistance Mov    | 1       | 3   | Military                                                | Middle East & North Africa | Unarmed Assault                                   |
| 3/14/16  | West Bank and Gaza Strip | Kiryat Arba             | Palestinian Extremists                                   | 2       | 1   | Military                                                | Middle East & North Africa | Armed Assault                                     |
| 3/4/16   | West Bank and Gaza Strip | Alon Shvut              | Palestinian Extremists                                   | 1       | 1   | Military                                                | Middle East & North Africa | Unarmed Assault                                   |
| 2/24/16  | Kuwait                   | Kuwait                  | Muslim extremists                                        | 1       | 0   | Police                                                  | Middle East & North Africa | Unarmed Assault                                   |
| 2/19/16  | West Bank and Gaza Strip | Ramallah                | Palestinian Extremists                                   | 1       | 0   | Military                                                | Middle East & North Africa | Unarmed Assault                                   |
| 1/31/16  | West Bank and Gaza Strip | Beit Ur al-Tahta        | Palestinian Extremists                                   | 0       | 1   | Military                                                | Middle East & North Africa | Unarmed Assault                                   |
| 1/1/16   | France                   | Valence                 | Jihadi-inspired extremists                               | 0       | 3   | Military                                                | Western Europe             | Unarmed Assault                                   |
| 12/31/15 | West Bank and Gaza Strip | Hawara                  | Palestinian Extremists                                   | 1       | 1   | Military                                                | Middle East & North Africa | Unarmed Assault                                   |
| 12/26/15 | West Bank and Gaza Strip | Hawara                  | Palestinian Extremists                                   | 1       | 1   | Military                                                | Middle East & North Africa | Unarmed Assault                                   |
| 12/25/15 | West Bank and Gaza Strip | Silwad                  | Palestinian Extremists                                   | 1       | 0   | Military                                                | Middle East & North Africa | Unarmed Assault                                   |
| 12/24/15 | West Bank and Gaza Strip | Al-Ram                  | Palestinian Extremists                                   | 1       | 1   | Police,Military                                         | Middle East & North Africa | Unarmed Assault                                   |
| 12/18/15 | West Bank and Gaza Strip | Silwad                  | Palestinian Extremists                                   | 1       | 0   | Military                                                | Middle East & North Africa | Unarmed Assault                                   |
| 12/18/15 | West Bank and Gaza Strip | Jerusalem               | Palestinian Extremists                                   | 0       | 1   | Police,Military                                         | Middle East & North Africa | Unarmed Assault                                   |
| 12/14/15 | Israel                   | Jerusalem               | Hamas (Islamic Resistance Movement)                      | 0       | 14  | Transportation                                          | Middle East & North Africa | Unarmed Assault                                   |
| 12/11/15 | West Bank and Gaza Strip | Halhul                  | Palestinian Extremists                                   | 1       | 0   | Military                                                | Middle East & North Africa | Unarmed Assault                                   |
| 12/10/15 | West Bank and Gaza Strip | Kfar Luban              | Hamas (Islamic Resistance Movement)                      | 0       | 4   | Military                                                | Middle East & North Africa | Unarmed Assault                                   |
| 12/6/15  | Israel                   | Jerusalem               | Palestinian Extremists                                   | 1       | 2   | Police,Private Citizens & Property                      | Middle East & North Africa | Armed Assault                                     |
| 12/4/15  | West Bank and Gaza Strip | Ora                     | Palestinian Extremists                                   | 1       | 2   | Military                                                | Middle East & North Africa | Unarmed Assault                                   |
| 11/27/15 | West Bank and Gaza Strip | Bayt Umar               | Palestinian Extremists                                   | 1       | 6   | Military                                                | Middle East & North Africa | Unarmed Assault                                   |
| 11/27/15 | West Bank and Gaza Strip | Kefar Adumim            | Palestinian Extremists                                   | 1       | 2   | Military                                                | Middle East & North Africa | Unarmed Assault                                   |
| 11/24/15 | West Bank and Gaza Strip | Tapuah                  | Palestinian Extremists                                   | 0       | 5   | Police,Military                                         | Middle East & North Africa | Unarmed Assault                                   |
| 11/23/15 | West Bank and Gaza Strip | Shavei Shomron          | Palestinian Extremists                                   | 0       | 1   | Private Citizens & Property                             | Middle East & North Africa | Unarmed Assault                                   |
| 11/22/15 | West Bank and Gaza Strip | Kefar Adumim            | Palestinian Extremists                                   | 1       | 1   | Private Citizens & Property                             | Middle East & North Africa | Armed Assault                                     |
| 11/20/15 | West Bank and Gaza Strip | Abu Dis                 | Palestinian Extremists                                   | 0       | 1   | Police                                                  | Middle East & North Africa | Unarmed Assault                                   |
| 11/14/15 | West Bank and Gaza Strip | Psagot                  | Palestinian Extremists                                   | 1       | 4   | Private Citizens & Property                             | Middle East & North Africa | Unarmed Assault                                   |
| 11/8/15  | West Bank and Gaza Strip | Tapuah                  | Palestinian Extremists                                   | 1       | 4   | Transportation                                          | Middle East & North Africa | Unarmed Assault                                   |
| 11/6/15  | West Bank and Gaza Strip | Halhul                  | Palestinian Extremists                                   | 1       | 0   | Military                                                | Middle East & North Africa | Unarmed Assault                                   |
| 11/4/15  | West Bank and Gaza Strip | Halhul                  | Palestinian Extremists                                   | 2       | 2   | Police                                                  | Middle East & North Africa | Unarmed Assault                                   |
| 11/1/15  | West Bank and Gaza Strip | Beit Einar              | Palestinian Extremists                                   | 0       | 3   | Police                                                  | Middle East & North Africa | Unarmed Assault                                   |
| 10/21/15 | West Bank and Gaza Strip | Bayt Umar               | Palestinian Extremists                                   | 0       | 5   | Military                                                | Middle East & North Africa | Unarmed Assault                                   |
| 10/21/15 | West Bank and Gaza Strip | Ora                     | Palestinian Extremists                                   | 0       | 1   | Police                                                  | Middle East & North Africa | Unarmed Assault                                   |
| 10/20/15 | West Bank and Gaza Strip | Alon Shvut              | Palestinian Extremists                                   | 1       | 2   | Military                                                | Middle East & North Africa | Armed Assault                                     |
| 10/13/15 | Israel                   | Jerusalem               | Palestinian Extremists                                   | 1       | 3   | Transportation                                          | Middle East & North Africa | Armed Assault                                     |
| 10/11/15 | Israel                   | Gan Shmuel              | Palestinian Extremists                                   | 0       | 4   | Military,Private Citizens & Property                    | Middle East & North Africa | Armed Assault                                     |
| 10/7/15  | West Bank and Gaza Strip | Masfa Adumim            | Palestinian Extremists                                   | 0       | 3   | Police                                                  | Middle East & North Africa | Unarmed Assault                                   |
| 9/30/15  | Afghanistan              | Kunduz                  | Taliban                                                  | 3       | 0   | Private Citizens & Property                             | South Asia                 | Unarmed Assault                                   |
| 8/29/15  | West Bank and Gaza Strip | Hebron                  | Palestinian Extremists                                   | 0       | 1   | Military                                                | Middle East & North Africa | Unarmed Assault                                   |
| 8/20/15  | Turkey                   | Istanbul                | Unknown                                                  | 0       | 0   | Journalists & Media                                     | Middle East & North Africa | Assassination                                     |
| 8/20/15  | Syria                    | Qaratayn                | Islamic State of Iraq and the Levant (ISIL)              | 0       | 0   | Religious Figures/Institutions                          | Middle East & North Africa | Facility/Infrastructure Attack                    |
| 8/6/15   | West Bank and Gaza Strip | Shilo                   | Palestinian Extremists                                   | 0       | 4   | Military                                                | Middle East & North Africa | Unarmed Assault                                   |
| 7/21/15  | Somalia                  | Bardere                 | Al-Shabaab                                               | 36      | 37  | Military                                                | Sub-Saharan Africa         | Armed Assault                                     |
| 6/30/15  | Mexico                   | Unknown                 | Unknown                                                  | 1       | 0   | Journalists & Media                                     | North America              | Assassination                                     |
| 6/30/15  | West Bank and Gaza Strip | Jerusalem               | Palestinian Extremists                                   | 0       | 1   | Military                                                | Middle East & North Africa | Unarmed Assault                                   |
| 6/26/15  | France                   | Saint-Quentin-Fallavier | Jihadi-inspired extremists                               | 1       | 2   | Business                                                | Western Europe             | Hostage Taking (Barricade Incident),Armed Assault |
| 5/20/15  | West Bank and Gaza Strip | Jerusalem               | Hamas (Islamic Resistance Movement)                      | 1       | 2   | Police                                                  | Middle East & North Africa | Unarmed Assault                                   |
| 5/14/15  | West Bank and Gaza Strip | Alon Shvut              | Palestinian Extremists                                   | 0       | 4   | Private Citizens & Property                             | Middle East & North Africa | Unarmed Assault                                   |
| 4/25/15  | West Bank and Gaza Strip | Jerusalem               | Palestinian Extremists                                   | 0       | 4   | Police                                                  | Middle East & North Africa | Unarmed Assault                                   |

|            |                          |                          |                                                            |      |         |                                                                          |                            |                                                   |
|------------|--------------------------|--------------------------|------------------------------------------------------------|------|---------|--------------------------------------------------------------------------|----------------------------|---------------------------------------------------|
| 4/15/15    | West Bank and Gaza Strip | Jerusalem                | Palestinian Extremists                                     | 1    | 2       | Transportation                                                           | Middle East & North Africa | Unarmed Assault                                   |
| 3/7/15     | Iraq                     | Hatra                    | Islamic State of Iraq and the Levant (ISIL)                | 0    | 0       | Private Citizens & Property                                              | Middle East & North Africa | Bombing/Explosion, Facility/Infrastructure Attack |
| 3/6/15     | West Bank and Gaza Strip | Jerusalem                | Palestinian Extremists                                     | 0    | 6       | Police, Transportation                                                   | Middle East & North Africa | Armed Assault                                     |
| 3/5/15     | Iraq                     | Nimrud                   | Islamic State of Iraq and the Levant (ISIL)                | 0    | 0       | Private Citizens & Property                                              | Middle East & North Africa | Facility/Infrastructure Attack                    |
| 1/31/15    | Egypt                    | Sheikh Zuweid            | Unknown                                                    | 1    | 0       | Military                                                                 | Middle East & North Africa | Armed Assault                                     |
| 12/21/14   | France                   | Dijon                    | Unknown                                                    | 0    | 11      | Private Citizens & Property                                              | Western Europe             | Unarmed Assault                                   |
| 11/5/14    | West Bank and Gaza Strip | Alon Shvut               | Palestinian Extremists                                     | 0    | 3       | Military                                                                 | Middle East & North Africa | Unarmed Assault                                   |
| 11/5/14    | Israel                   | Jerusalem                | Hamas (Islamic Resistance Movement)                        | 4    | 12      | Police, Private Citizens & Property                                      | Middle East & North Africa | Unarmed Assault                                   |
| 11/4/14    | Taiwan                   | Taipei                   | Unknown                                                    | 0    | 0       | Government (General)                                                     | East Asia                  | Unarmed Assault                                   |
| 10/25/14   | Nigeria                  | Effun                    | Unknown                                                    | 0    | 0       | Private Citizens & Property                                              | Sub-Saharan Africa         | Facility/Infrastructure Attack                    |
| 10/22/14   | West Bank and Gaza Strip | Jerusalem                | Hamas (Islamic Resistance Movement)                        | 3    | 7       | Private Citizens & Property, Private Citizens & Property, Transportation | Middle East & North Africa | Unarmed Assault                                   |
| 10/20/14   | Canada                   | Saint-Jean-sur-Richelieu | Jihadi-inspired extremists                                 | 2    | 1       | Military                                                                 | North America              | Armed Assault                                     |
| 9/2/14     | West Bank and Gaza Strip | Qalqilya                 | Palestinian Extremists                                     | 1    | 2       | Military, Private Citizens & Property                                    | Middle East & North Africa | Unarmed Assault                                   |
| 8/27/14    | Syria                    | Quneitra                 | Al-Nusra Front                                             | 23   | Unknown | Military, Government (Diplomatic)                                        | Middle East & North Africa | Hostage Taking (Kidnapping), Armed Assault        |
| 8/24/14    | United Kingdom           | Ballygowley              | Unknown                                                    | 0    | 0       | Government (General)                                                     | Western Europe             | Unarmed Assault                                   |
| 8/23/14    | Iraq                     | Baji                     | Islamic State of Iraq and the Levant (ISIL)                | 30   | Unknown | Business                                                                 | Middle East & North Africa | Bombing/Explosion                                 |
| 8/16/14    | United Kingdom           | Ballygowley              | Unknown                                                    | 0    | 0       | Government (General)                                                     | Western Europe             | Unarmed Assault                                   |
| 8/4/14     | Israel                   | Jerusalem                | Palestinian Extremists                                     | 2    | 5       | Transportation                                                           | Middle East & North Africa | Unarmed Assault                                   |
| 7/25/14    | Sudan                    | Serif Omar district      | Janjaweed                                                  | 1    | 1       | Government (Diplomatic)                                                  | Sub-Saharan Africa         | Hostage Taking (Kidnapping), Armed Assault        |
| 7/23/14    | Nigeria                  | Kaduna                   | Boko Haram                                                 | 14   | 2       | Private Citizens & Property, Private Citizens & Property                 | Sub-Saharan Africa         | Assassination                                     |
| 7/4/14     | Iraq                     | Tal Afar                 | Islamic State of Iraq and the Levant (ISIL)                | 0    | 0       | Religious Figures/Institutions                                           | Middle East & North Africa | Bombing/Explosion                                 |
| 6/21/14    | China                    | Yecheng district         | Unknown                                                    | 13   | 3       | Police                                                                   | East Asia                  | Bombing/Explosion                                 |
| 6/18/14    | Libya                    | Derna                    | Muslim extremists                                          | 0    | 0       | Religious Figures/Institutions                                           | Middle East & North Africa | Facility/Infrastructure Attack                    |
| 5/31/14    | Pakistan                 | Sargodha                 | Taliban, Tehrik-i-Taliban Pakistan (TTP)                   | 0    | 0       | Government (General)                                                     | South Asia                 | Hostage Taking (Kidnapping)                       |
| 5/23/14    | United States            | Isla Vista               | Incel extremists                                           | 4    | 13      | Private Citizens & Property                                              | North America              | Armed Assault                                     |
| 5/22/14    | China                    | Urumqi                   | Uighur Separatists                                         | 36   | 94      | Private Citizens & Property                                              | East Asia                  | Bombing/Explosion                                 |
| 4/16/14    | Ukraine                  | Mariupol                 | Donetsk People's Republic                                  | 3    | 13      | Military                                                                 | Eastern Europe             | Facility/Infrastructure Attack                    |
| 4/16/14    | Bangladesh               | Naryanganj               | Unknown                                                    | 0    | 1       | NGO                                                                      | South Asia                 | Hostage Taking (Kidnapping)                       |
| 4/15/14    | Afghanistan              | Kabul                    | Unknown                                                    | 0    | 1       | Government (General)                                                     | South Asia                 | Hostage Taking (Kidnapping)                       |
| 3/15/14    | West Bank and Gaza Strip | Bayt Umar                | Unknown                                                    | 0    | 4       | Police                                                                   | Middle East & North Africa | Unarmed Assault                                   |
| 3/13/14    | Ireland                  | Ballyconnell             | Unknown                                                    | 0    | 0       | Business                                                                 | Western Europe             | Facility/Infrastructure Attack                    |
| 2/7/14     | India                    | Koimbejer                | Unknown                                                    | 0    | 0       | Government (General)                                                     | South Asia                 | Assassination                                     |
| 10/28/13   | China                    | Beijing                  | Turkistan Islamic Party                                    | 5    | 40      | Private Citizens & Property                                              | East Asia                  | Armed Assault                                     |
| 10/17/13   | West Bank and Gaza Strip | Rama                     | Palestinian Extremists                                     | 1    | 1       | Military                                                                 | Middle East & North Africa | Unarmed Assault                                   |
| 5/22/13    | United Kingdom           | London                   | Muslim extremists                                          | 1    | 0       | Military                                                                 | Western Europe             | Armed Assault                                     |
| 5/14/13    | Iraq                     | Baghdad                  | Muslim extremists (suspected)                              | 12   | 3       | Business                                                                 | Middle East & North Africa | Armed Assault                                     |
| 5/2/13     | Nigeria                  | Marte                    | Boko Haram                                                 | 0    | 0       | Private Citizens & Property                                              | Sub-Saharan Africa         | Armed Assault                                     |
| 4/11/13    | India                    | Jamui district           | Maosists                                                   | 0    | 0       | Government (General)                                                     | South Asia                 | Facility/Infrastructure Attack                    |
| 4/11/13    | India                    | Jamui district           | Maosists                                                   | 0    | 0       | Government (General)                                                     | South Asia                 | Bombing/Explosion                                 |
| 12/3/12    | West Bank and Gaza Strip | Shavei Shomron           | Palestinian Extremists                                     | 1    | 2       | Police                                                                   | Middle East & North Africa | Armed Assault                                     |
| 10/1/12    | China                    | Kargilik                 | Unknown                                                    | 1    | Unknown | Police                                                                   | East Asia                  | Unarmed Assault                                   |
| 9/19/12    | Russia                   | Kizilyurt                | Unknown                                                    | 0    | 1       | Police                                                                   | Eastern Europe             | Armed Assault                                     |
| 8/25/12    | Libya                    | Tripoli                  | Muslim extremists                                          | 0    | 0       | Religious Figures/Institutions                                           | Middle East & North Africa | Facility/Infrastructure Attack                    |
| 8/24/12    | Libya                    | Zliten                   | Muslim extremists                                          | 0    | 0       | Private Citizens & Property, Religious Figures/Institutions              | Middle East & North Africa | Bombing/Explosion                                 |
| 7/9/12     | Afghanistan              | Marjah                   | Unknown                                                    | 3    | 0       | Military                                                                 | South Asia                 | Unarmed Assault                                   |
| 3/14/12    | Afghanistan              | Washar district          | Unknown                                                    | 0    | 2       | Military                                                                 | South Asia                 | Unarmed Assault                                   |
| 12/17/11   | India                    | Sarkanta                 | Communist Party of India - Maoist (CPI-Maoist)             | 0    | 0       | Educational Institution                                                  | South Asia                 | Bombing/Explosion, Facility/Infrastructure Attack |
| 11/9/11    | India                    | Gaya district            | Maosists                                                   | 0    | 0       | Educational Institution                                                  | South Asia                 | Facility/Infrastructure Attack                    |
| 11/9/11    | India                    | Gaya district            | Maosists                                                   | 0    | 0       | Educational Institution                                                  | South Asia                 | Facility/Infrastructure Attack                    |
| 2011-11-00 | Pakistan                 | Bera                     | Lashkar-e-Islam (Pakistan)                                 | 0    | 0       | Educational Institution                                                  | South Asia                 | Facility/Infrastructure Attack                    |
| 7/30/11    | China                    | Kashgar                  | Uighur Separatists (suspected)                             | 8    | 22      | Private Citizens & Property                                              | East Asia                  | Armed Assault                                     |
| 12/24/10   | Colombia                 | Neva                     | Revolutionary Armed Forces of Colombia (FARC) (suspe       | 0    | 0       | Business                                                                 | South America              | Hijacking, Armed Assault                          |
| 10/30/10   | India                    | Banda                    | Triitya Prastuti Committee (TPC) (suspected)               | 0    | 0       | Private Citizens & Property                                              | South Asia                 | Facility/Infrastructure Attack                    |
| 7/12/10    | Ireland                  | Broadway                 | Unknown                                                    | 0    | 7       | Private Citizens & Property                                              | Western Europe             | Unarmed Assault                                   |
| 2/18/10    | United States            | Austin                   | Anti-Government extremists                                 | 2    | 15      | Government (General)                                                     | North America              | Facility/Infrastructure Attack                    |
| 5/1/09     | Netherlands              | Apeldoorn                | Unknown                                                    | 7    | 12      | Government (General)                                                     | Western Europe             | Assassination                                     |
| 3/5/09     | Israel                   | Jerusalem                | Unknown                                                    | 1    | 2       | Police                                                                   | Middle East & North Africa | Unarmed Assault                                   |
| 8/4/08     | China                    | Kashgar                  | Turkistan Islamic Party, Eastern Turkistan Islamic Movem   | 16   | 17      | Police                                                                   | East Asia                  | Armed Assault                                     |
| 7/2/08     | Israel                   | Jerusalem                | Popular Front for the Liberation of Palestine (PFLP), Al-' | 4    | 45      | Private Citizens & Property                                              | Middle East & North Africa | Unarmed Assault                                   |
| 6/30/07    | United Kingdom           | Abbotsinch               | Al-Qaida in Iraq (suspected)                               | 1    | 2       | Airports and Aircraft, Private Citizens & Property                       | Western Europe             | Armed Assault                                     |
| 9/11/06    | United States            | Davenport                | Anti-Abortion extremists                                   | 0    | 0       | Business                                                                 | North America              | Facility/Infrastructure Attack                    |
| 3/3/06     | United States            | Chapel Hill              | Muslim extremists                                          | 0    | 9       | Private Citizens & Property                                              | North America              | Unarmed Assault                                   |
| 11/1/04    | Iraq                     | Baghdad                  | Ansar al-Sunna                                             | 1    | 2       | Government (General)                                                     | Middle East & North Africa | Assassination                                     |
| 9/3/04     | United Kingdom           | Belfast                  | Ulster Freedom Fighters (UFF) (suspected)                  | 0    | 0       | Business                                                                 | Western Europe             | Facility/Infrastructure Attack, Bombing/Explosion |
| 3/31/03    | United States            | Edgemont                 | Muslim extremists                                          | 0    | 0       | Military                                                                 | North America              | Facility/Infrastructure Attack                    |
| 3/30/03    | Kuwait                   | Udair                    | Egyptians                                                  | 0    | 16      | Military                                                                 | Middle East & North Africa | Unarmed Assault                                   |
| 1/5/02     | United States            | Tampa                    | Jihadi-inspired extremists                                 | 1    | 0       | Business                                                                 | North America              | Hijacking                                         |
| 9/11/01    | United States            | Shanksville              | Al-Qaida                                                   | 44   | 9       | Private Citizens & Property, Government (General), Airports and Aircraft | North America              | Hijacking, Armed Assault                          |
| 9/11/01    | United States            | Arlington                | Al-Qaida                                                   | 190  | 106     | Government (General), Military, Airports and Aircraft                    | North America              | Hijacking, Armed Assault                          |
| 9/11/01    | United States            | New York City            | Al-Qaida                                                   | 1385 | 10878   | Private Citizens & Property, Business, Airports and Aircraft             | North America              | Hijacking, Armed Assault                          |
| 9/11/01    | United States            | New York City            | Al-Qaida                                                   | 1385 | 10878   | Private Citizens & Property, Business, Airports and Aircraft             | North America              | Hijacking, Armed Assault                          |
| 2/4/01     | Israel                   | Holon                    | Hamas (Islamic Resistance Movement) (suspected)            | 8    | 17      | Military, Private Citizens & Property                                    | Middle East & North Africa | Armed Assault                                     |
| 8/10/99    | Israel                   | Rehovot                  | Unknown                                                    | 1    | 6       | Military                                                                 | Middle East & North Africa | Armed Assault                                     |
| 3/25/97    | Mexico                   | Chilpancingo             | Unknown                                                    | 1    | 0       | Government (General)                                                     | North America              | Assassination                                     |
| 2/17/97    | Japan                    | Unknown                  | Right-Wing Militants                                       | 0    | 0       | Government (General)                                                     | East Asia                  | Unarmed Assault                                   |
| 7/12/96    | Japan                    | Tokyo                    | Unknown                                                    | 0    | 0       | Government (Diplomatic)                                                  | East Asia                  | Unarmed Assault                                   |

|          |                          |                      |                                                        |    |         |                                                                         |                             |                                |
|----------|--------------------------|----------------------|--------------------------------------------------------|----|---------|-------------------------------------------------------------------------|-----------------------------|--------------------------------|
| 2/26/96  | Israel                   | Jerusalem            | Unknown                                                | 3  | 11      | Transportation                                                          | Middle East & North Africa  | Unarmed Assault                |
| 2/4/96   | Guatemala                | Antigua              | Unknown                                                | 1  | 0       | Government (General)                                                    | Central America & Caribbean | Assassination                  |
| 6/12/95  | West Bank and Gaza Strip | Ramallah             | Unknown                                                | 1  | 0       | Military                                                                | Middle East & North Africa  | Armed Assault                  |
| 10/9/94  | Haiti                    | Miragoane            | Revolutionary Front for Hatian Advancement and Progres | 14 | 0       | Government (General)                                                    | Central America & Caribbean | Unarmed Assault                |
| 10/7/94  | Haiti                    | Saint-Marc           | Unknown                                                | 4  | 0       | Private Citizens & Property                                             | Central America & Caribbean | Unarmed Assault                |
| 6/9/94   | Mexico                   | Unknown              | Unknown                                                | 1  | 0       | Government (General)                                                    | North America               | Assassination                  |
| 4/7/94   | West Bank and Gaza Strip | Hebron               | Israeli settlers                                       | 0  | 2       | Private Citizens & Property                                             | Middle East & North Africa  | Assassination                  |
| 11/29/92 | Venezuela                | Caracas              | Rebel Military Unit                                    | 0  | 0       | Government (General)                                                    | South America               | Facility/Infrastructure Attack |
| 9/29/92  | Poland                   | Warsaw               | Unknown                                                | 0  | 0       | Government (Diplomatic)                                                 | Eastern Europe              | Facility/Infrastructure Attack |
| 9/8/92   | United Kingdom           | Belfast              | Irish Republican Army (IRA) (suspected)                | 0  | 4       | Police                                                                  | Western Europe              | Facility/Infrastructure Attack |
| 3/30/92  | Madagascar               | Antananarivo         | Unknown                                                | 0  | 0       | Government (General)                                                    | Sub-Saharan Africa          | Assassination                  |
| 10/28/91 | Israel                   | Tirat Karmel         | Unknown                                                | 0  | 0       | Military                                                                | Middle East & North Africa  | Assassination                  |
| 10/11/91 | Israel                   | Tel Aviv             | Palestinians                                           | 2  | 11      | Military                                                                | Middle East & North Africa  | Unarmed Assault                |
| 10/3/91  | Taiwan                   | Taipei               | Anti-Nuclear extremists                                | 1  | 0       | Police                                                                  | East Asia                   | Assassination                  |
| 7/22/91  | Japan                    | Tokyo                | Taikosha, right wing group                             | 0  | 1       | Government (Diplomatic)                                                 | East Asia                   | Facility/Infrastructure Attack |
| 5/8/90   | India                    | Amritsar             | Sikh Extremists                                        | 1  | 2       | Police                                                                  | South Asia                  | Assassination                  |
| 7/6/89   | Israel                   | Tel-Aviv             | Palestinian Islamic Jihad (PIJ)                        | 16 | 27      | Transportation                                                          | Middle East & North Africa  | Unarmed Assault                |
| 7/28/88  | El Salvador              | San Salvador         | Death Squad (suspected)                                | 1  | 0       | Government (General)                                                    | Central America & Caribbean | Assassination                  |
| 3/2/87   | United Kingdom           | Belfast              | Unknown                                                | 0  | 4       | Business                                                                | Western Europe              | Bombing/Explosion              |
| 6/17/86  | Colombia                 | Bogota               | M-19 (Movement of April 19)                            | 0  | 2       | Government (General)                                                    | South America               | Bombing/Explosion              |
| 6/4/86   | Sri Lanka                | Kilinochchi District | Tamils                                                 | 6  | Unknown | Military                                                                | South Asia                  | Armed Assault                  |
| 6/23/85  | Sri Lanka                | Mannar District      | Tamils                                                 | 0  | 0       | Business                                                                | South Asia                  | Armed Assault                  |
| 9/5/84   | Chile                    | Santiago             | Unknown                                                | 0  | 0       | Police                                                                  | South America               | Armed Assault                  |
| 7/18/84  | Colombia                 | Cali                 | M-19 (Movement of April 19)                            | 1  | 1       | Business                                                                | South America               | Armed Assault                  |
| 6/20/84  | Chile                    | Santiago             | Manuel Rodriguez Patriotic Front (FPMR)                | 1  | 0       | Transportation                                                          | South America               | Bombing/Explosion              |
| 5/29/84  | India                    | Unknown              | Sikh Extremists                                        | 2  | 0       | Military                                                                | South Asia                  | Assassination                  |
| 6/20/82  | Guatemala                | Chiquimula           | Unknown                                                | 0  | 4       | Police                                                                  | Central America & Caribbean | Bombing/Explosion              |
| 3/27/80  | Thailand                 | Kamphaeng Phet       | Communists (suspected)                                 | 0  | 0       | Business                                                                | Southeast Asia              | Bombing/Explosion              |
| 6/15/79  | Japan                    | Tokyo                | Left-wing extremists                                   | 0  | 0       | Government (General)                                                    | East Asia                   | Facility/Infrastructure Attack |
| 11/1/70  | Pakistan                 | Karachi              | Unknown                                                | 4  | 20      | Government (Diplomatic),Government (Diplomatic),Government (Diplomatic) | South Asia                  | Assassination                  |
